# Supplementary material for: An Optogenetic Tool to Raise Intracellular pH in Single Cells and Drive Localized Membrane Dynamics
Source: PubMed Central journal article supplement — J Am Chem Soc. 2021 Nov 2;143(45):18877–87. doi: 10.1021/jacs.1c02156 (PMC8603357; doi:10.1021/jacs.1c02156), 2021-11-02
Supplement: ja1c02156_si_006.pdf [file ja1c02156_si_006.pdf]

## **SUPPORTING INFO**

**Title:** An optogenetic tool to raise intracellular pH in single cells and drive localized membrane dynamics

**Author List:** Caitlin E. T. Donahue<sup>a,b</sup>, Michael D. Siroky<sup>a,b</sup>, and Katharine A. White<sup>a,b\*</sup>

### **Institution Address:**

<sup>a</sup>Department of Chemistry and Biochemistry, University of Notre Dame, Notre Dame, IN 46556, United States

<sup>b</sup>Mike and Josie Harper Cancer Research Institute, University of Notre Dame, South Bend, IN 46617, United States

### **Corresponding author:**

\*Email: [kwhite6@nd.edu](mailto:kwhite6@nd.edu)

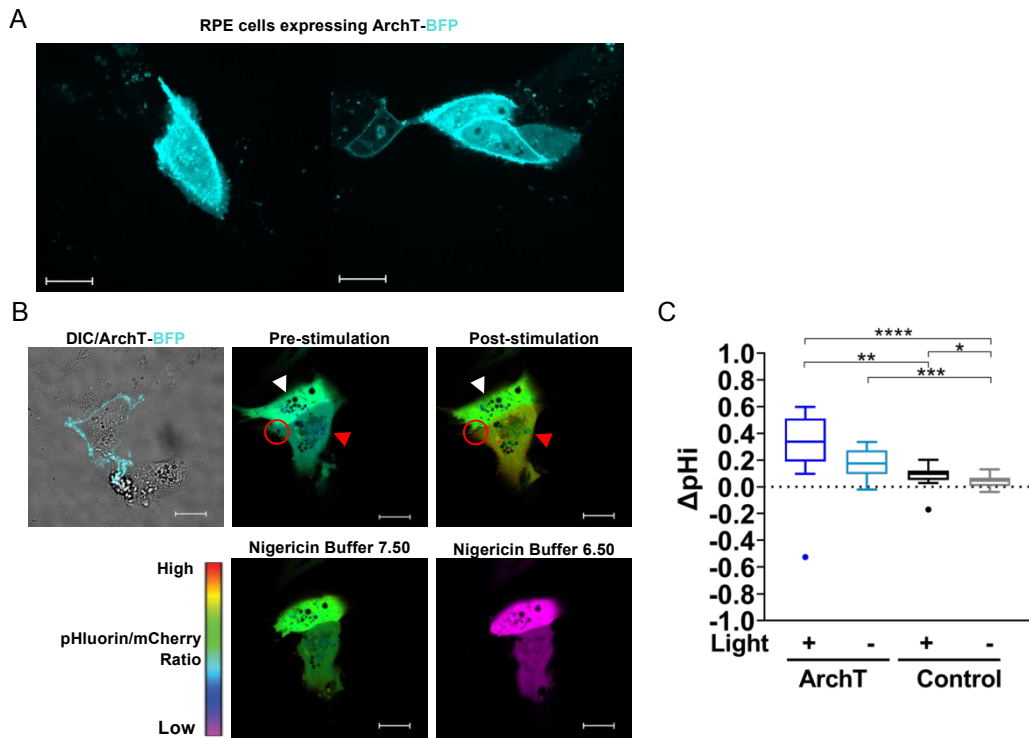

**Figure S1. Quantification of Archaeorhodopsin pHi increases using ratiometric mCherry-pHluorin imaging.** (A) Representative images of RPE cells expressing ArchT-BFP. Scale bar 20  $\mu$ m. (B) An ArchT RPE cell expressing mCherry-pHluorin (red arrow) and control RPE cell expressing mCherry-pHluorin (white arrow) are both photoactivated with 561 nm light within the stimulation region of interest (ROI, red circle). Ratiometric display of pHluorin/mCherry fluorescence ratios pre-stimulation, post-stimulation, and during pH standardization (see methods for details). Scale bar 20  $\mu$ m. (C) Quantification of pHi changes for stimulated (+Light) and unstimulated (-Light) cells prepared as described in (B). Tukey boxplots (n = 15-55 cells per condition, 2 biological replicates), significance determined using the Kruskal-Wallis test, Dunn's multiple comparison correction. \* p<0.05, \*\* p<0.01, \*\*\* p<0.001, \*\*\*\* p<0.0001.

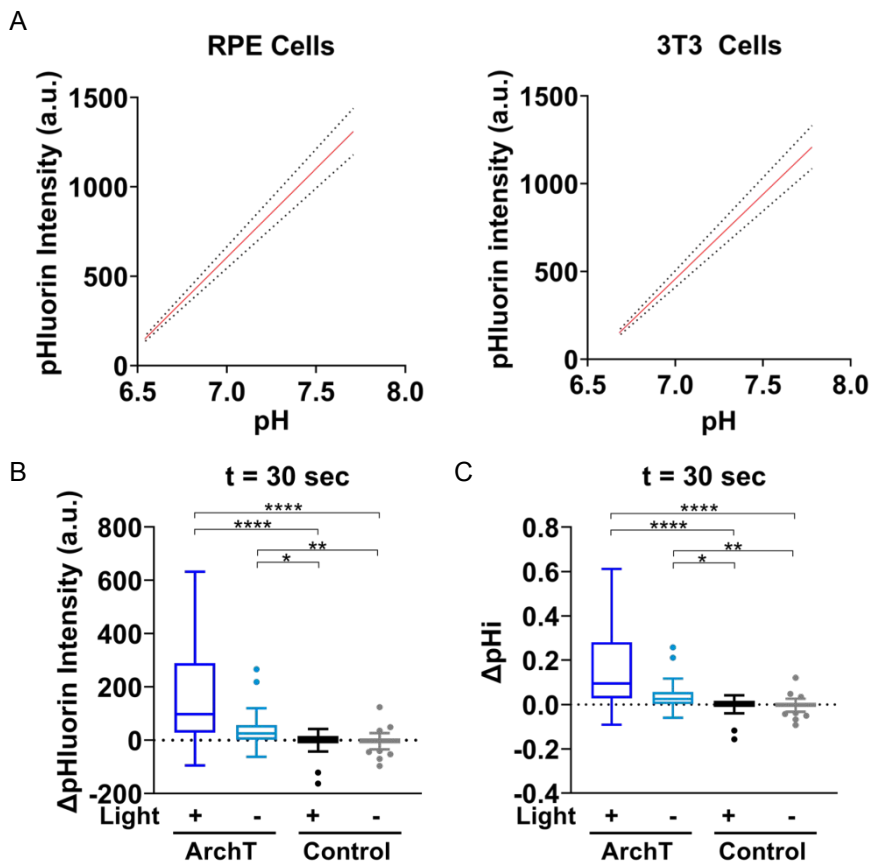

**Figure S2. Standard curves for back-calculation of pHi data from pHLuorin intensity.** (A) Standard curve data from pHLuorin intensity measurements in RPE and NIH-3T3 cells. The red line indicates the mean while the dotted black lines represent the 95% confidence interval. (n=261 cells for RPE, n=64 cells for 3T3, 2 biological replicates). (B) Additional quantification from Figure 1E. Quantification of pHLuorin intensity changes at 30 seconds into experiment (30% LED power). (C) Quantification of pHi changes in cells in (B) using standard curves in (A). For (B-C) Tukey boxplots (n= 26-62, 3-5 biological replicates). Significance determined using the Kruskal-Wallis test, Dunn's multiple comparison correction, \*p<0.05, \*\*p<0.01, and \*\*\*\*p<0.0001

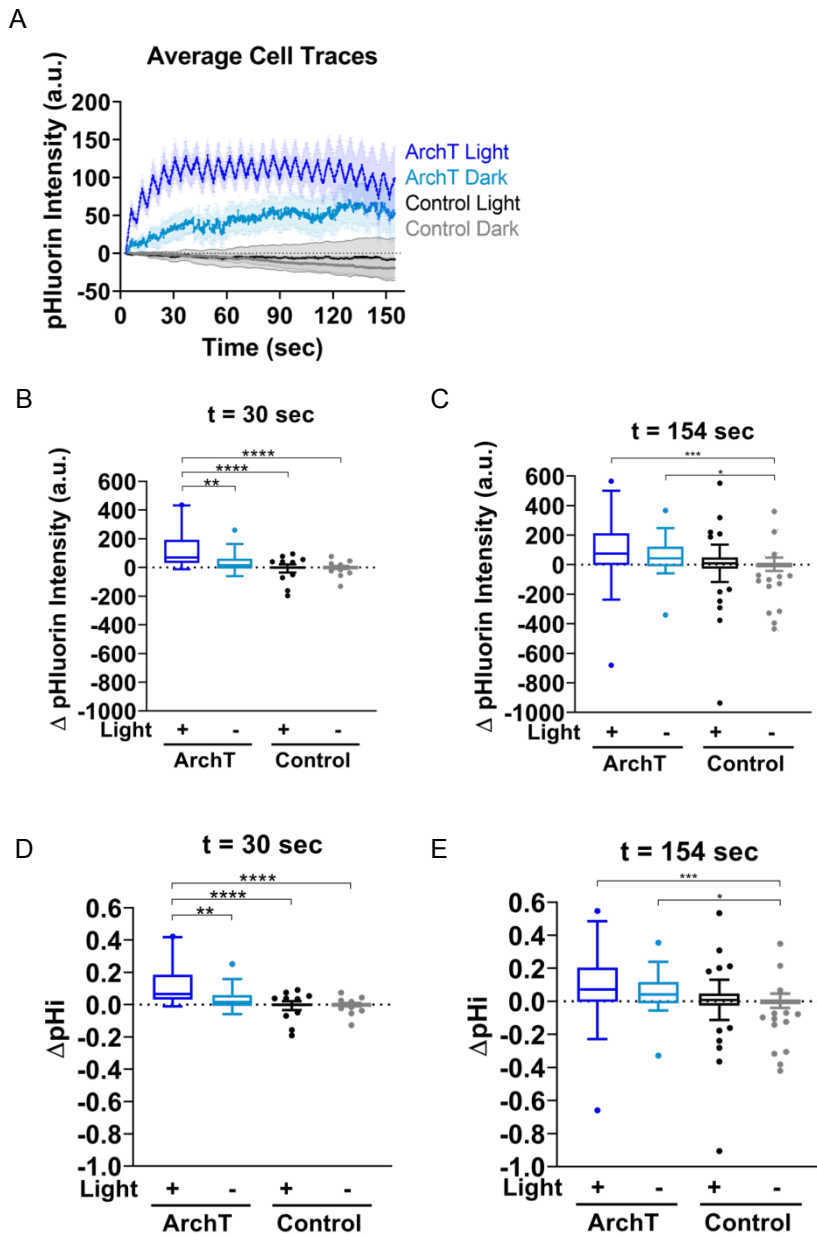

**Figure S3: ArchT-mediated pH changes in RPE cells using 100% LED Power.** (A) Average pHluorin intensity traces over the course of the 100% LED power stimulation experiment. Traces show mean  $\pm$  SEM ( $n = 20-69$  cells from 3-5 biological replicates). (B-C) Quantification of pHluorin intensity changes at 30 sec (B) and the end (C) of the experiment in (A). (D-E) Quantification of pHi changes at 30 sec (D) and the end (E) of the experiment in (A). For (B-E), Tukey boxplots shown with significance determined using the Kruskal-Wallis test, Dunn's multiple comparison correction,  $*p < 0.05$ ,  $**p < 0.01$ ,  $***p < 0.001$ , and  $****p < 0.0001$ .

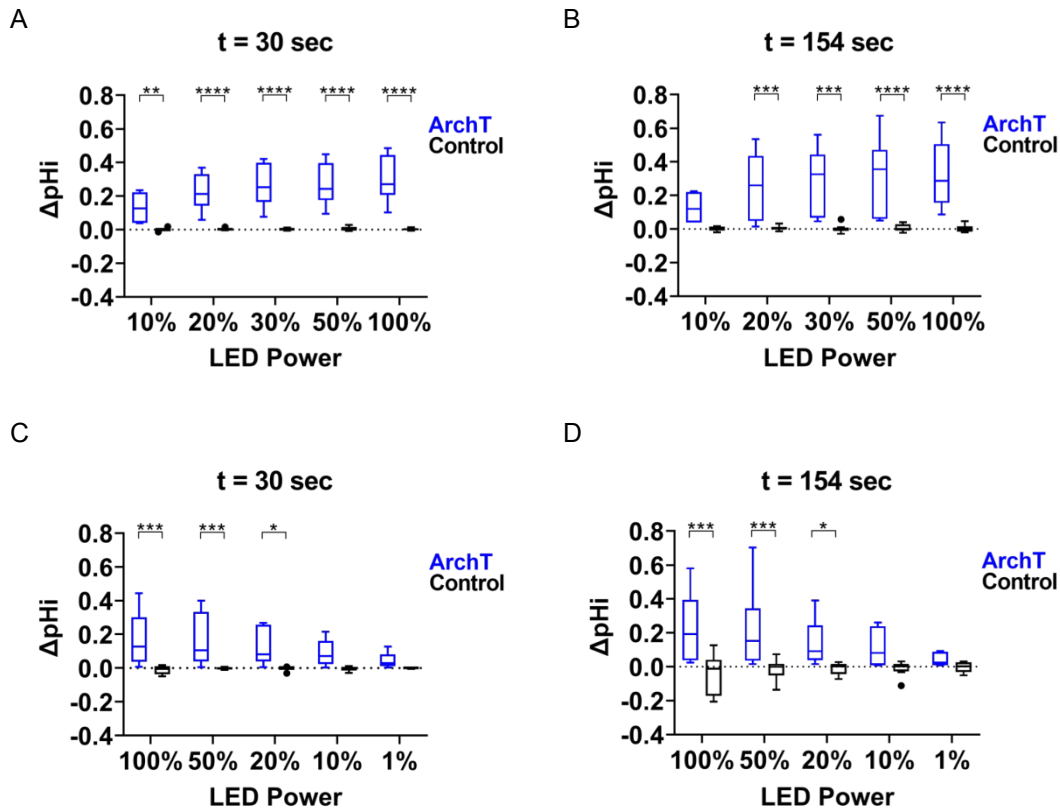

**Figure S4: ArchT increases pHi at a range of LED stimulation powers.** Quantification of pHi change using an increasing sequence (10%, 20%, 30%, 50%, 100%) of LED stimulation power titration at (A) 30 seconds and (B) at the end of the experiment (154 seconds). Quantification of pHi using a decreasing LED stimulation power sequence (100%, 50%, 20%, 10%, 1%) at (C) 30 seconds and (D) at the end of the experiment (154 seconds). For (A-D) Tukey boxplots (n= 6-8 cells per condition from 1-3 biological replicates), significance determined using two-way ANOVA and Holm-Šidák's multiple comparison test. \* $p < 0.05$ , \*\* $p < 0.01$ , \*\*\* $p < 0.001$ , and \*\*\*\* $p < 0.0001$ .

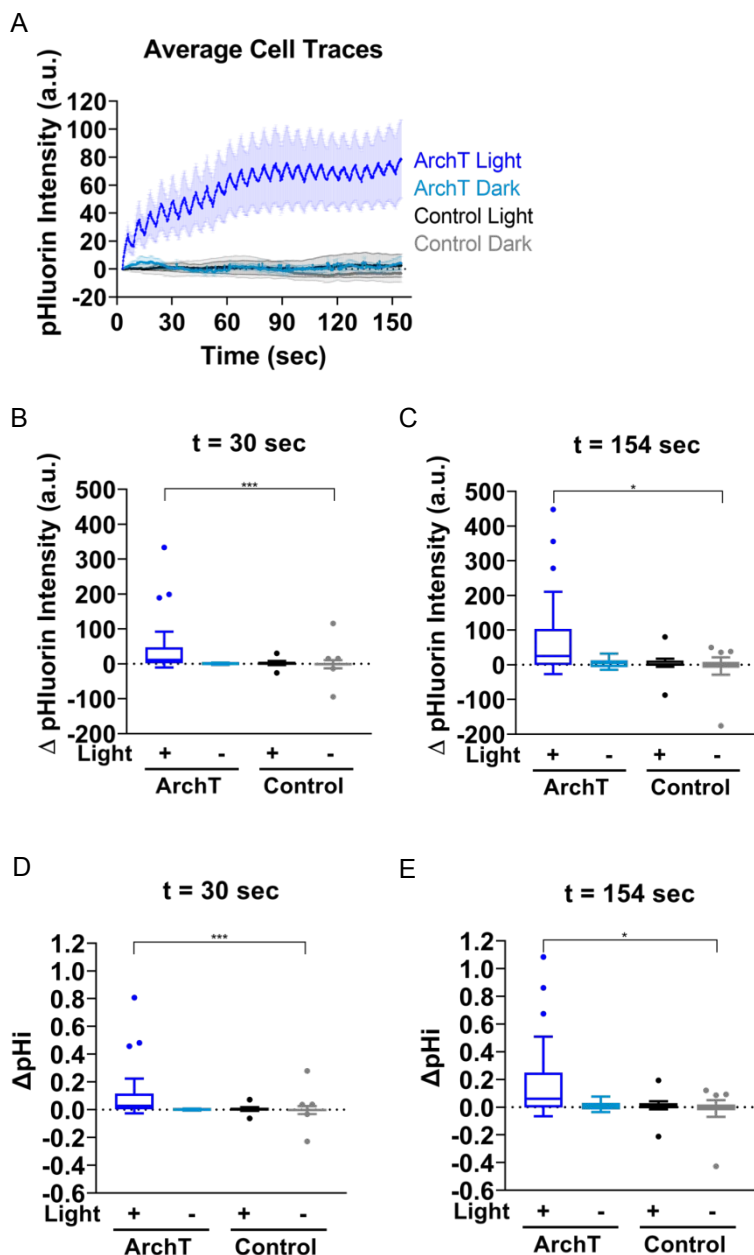

**Figure S5: Archaeorhodopsin can spatiotemporally increase pHi in single NIH-3T3 cells. (A)**

Average pHluorin intensity traces over the course of the stimulation experiment. Traces show mean  $\pm$  SEM ( $n = 9$ -31 cells per condition from 3 biological replicates). **(B-C)** Quantification of pHluorin intensity changes at 30 sec **(B)** and the end **(C)** of the experiment in **(A)**. **(D-E)** Change in pHi quantified for cells at 30 sec **(D)** and at the end **(E)** of the experiment in **(A)**. For B-E, Tukey boxplots,  $n = 9$ -31 per condition significance determined using the Kruskal-Wallis test, Dunn's multiple comparison correction,  $*p < 0.05$ , and  $***p < 0.0001$ .

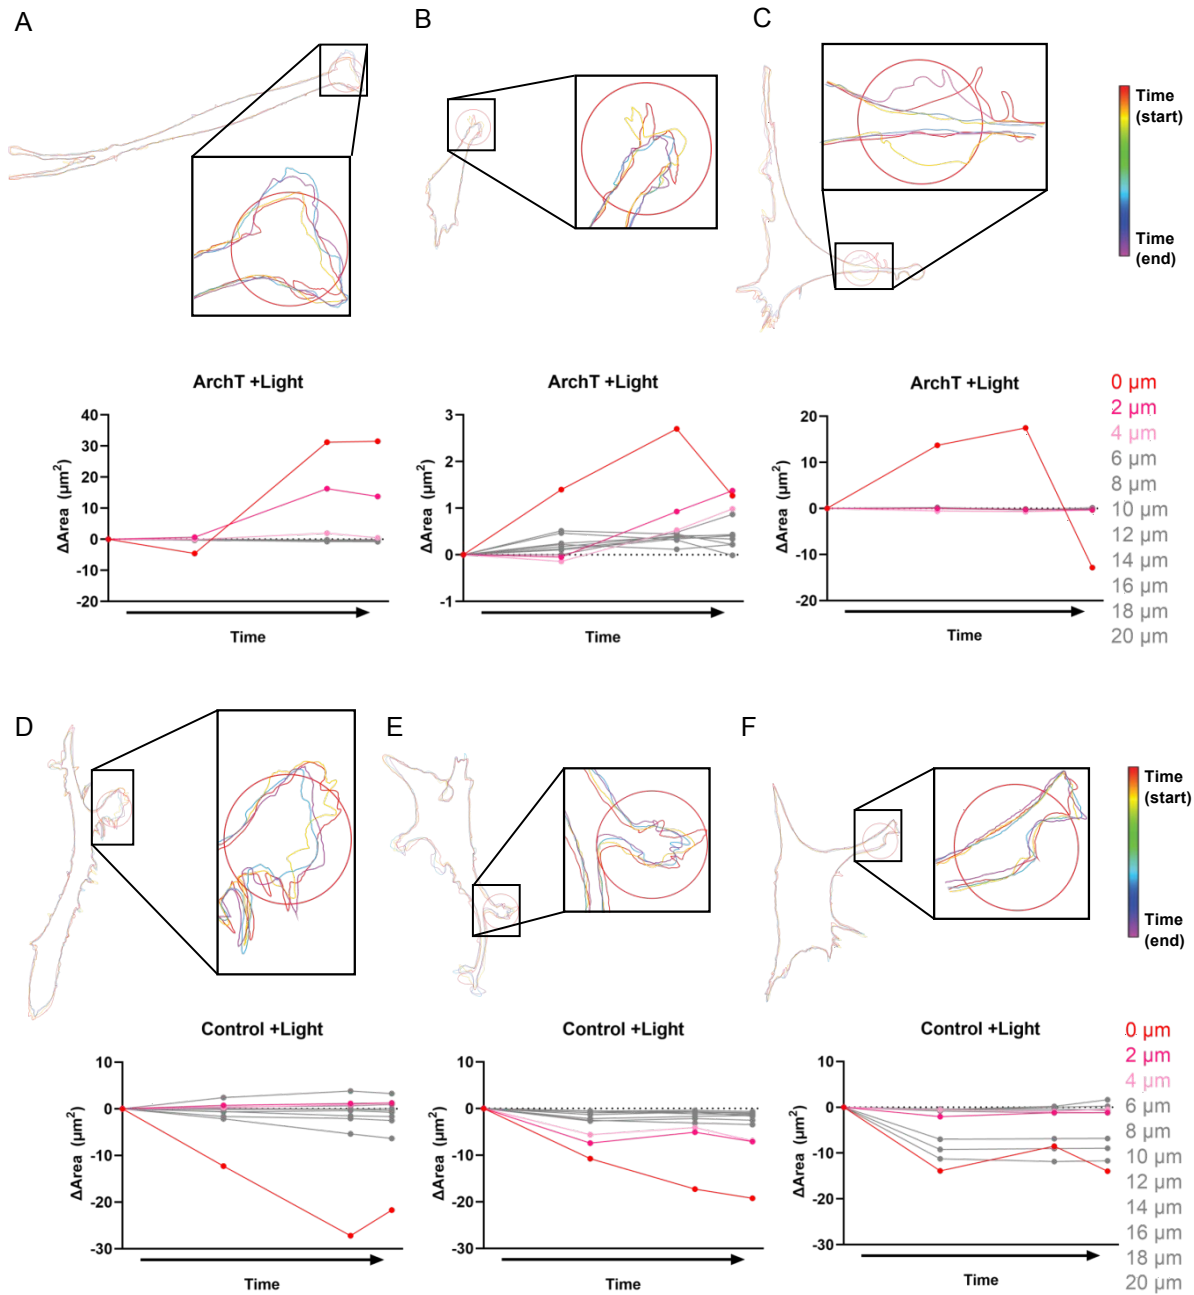

**Figure S6. Additional Membrane Responses for NIH-3T3 cells treated as in Figure 3.** Additional representative images of ArchT (A-C) and Control expressing (D-F) NIH-3T3 cells stimulated with 561 nm light. As in Figure 3, membranes were traced at key movie frames and overlaid,  $t=0$  sec (red) to 154 sec (violet). Zoomed-in sections of the stimulation region and the membrane dynamics are also provided. As in Figure 4, change in area for segmented cells are located below their respective trace. 0  $\mu\text{m}$  indicates the stimulation ROI with each subsequent segment representing 2  $\mu\text{m}$  intervals.

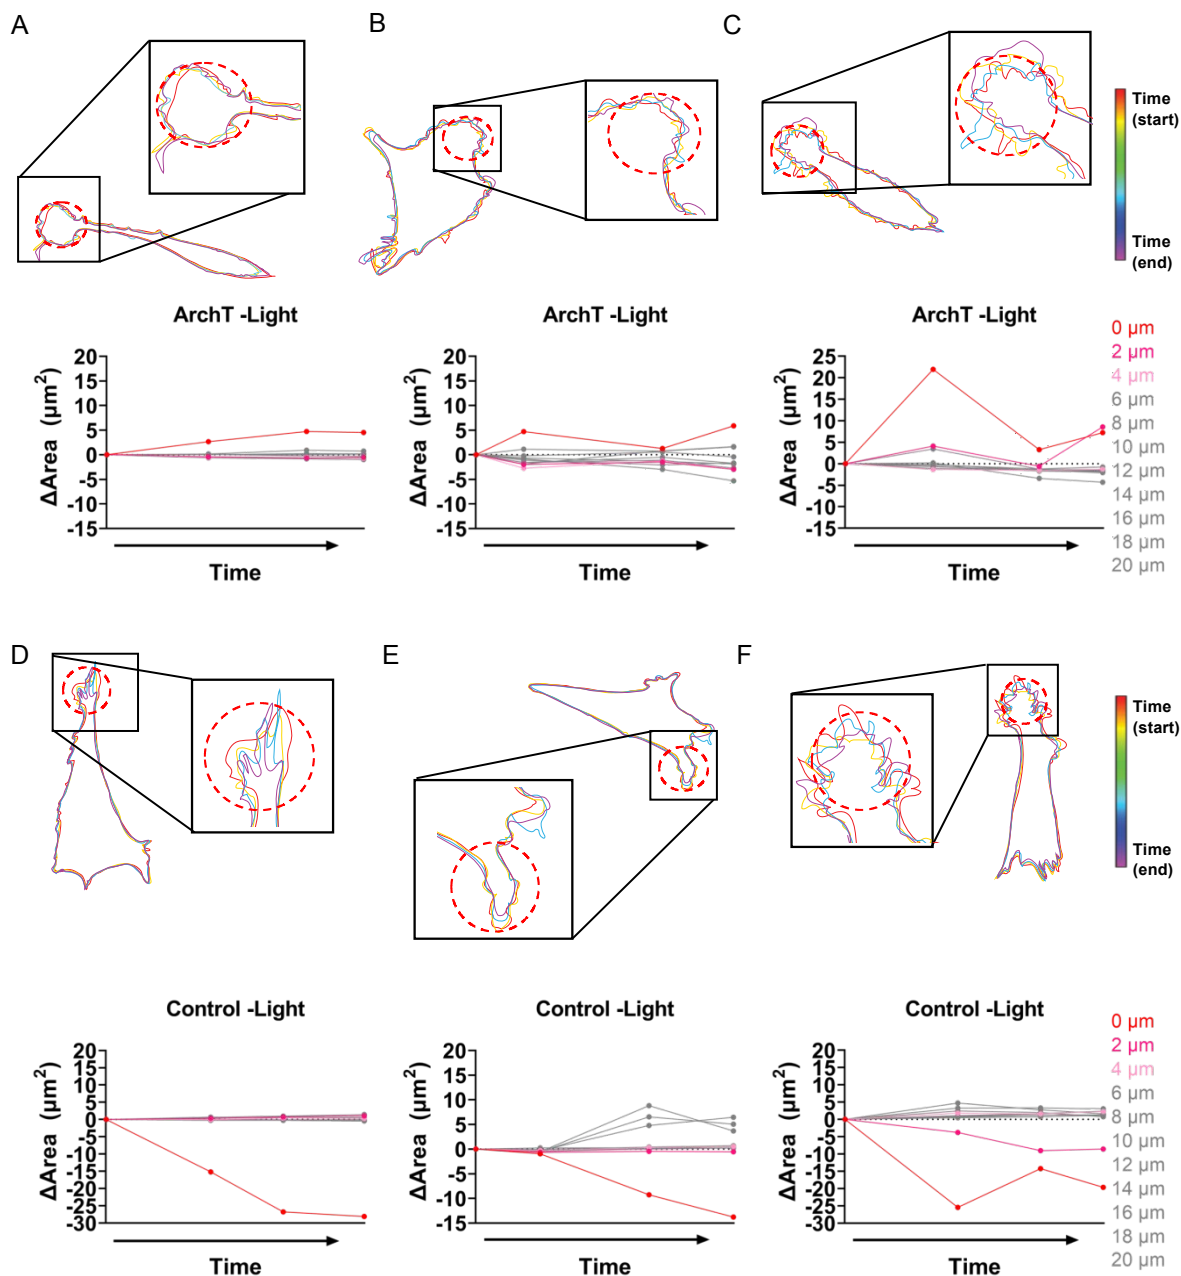

**Figure S7. Additional Membrane Responses for NIH-3T3 cells mock stimulated as in Figure 3.** Additional representative images of ArchT (A-C) and Control expressing (D-F) NIH-3T3 cells mock-stimulated (no 561 nm light). As in Figure 3, membranes were traced at key movie frames and overlaid,  $t = 0$  sec (red) to 154 sec (violet). Zoomed-in sections of the stimulation region and the membrane dynamics are also provided. As in Figure 4, change in area for segmented cells are located below their respective trace. 0  $\mu\text{m}$  indicates the stimulation ROI with each subsequent segment representing 2  $\mu\text{m}$  intervals.



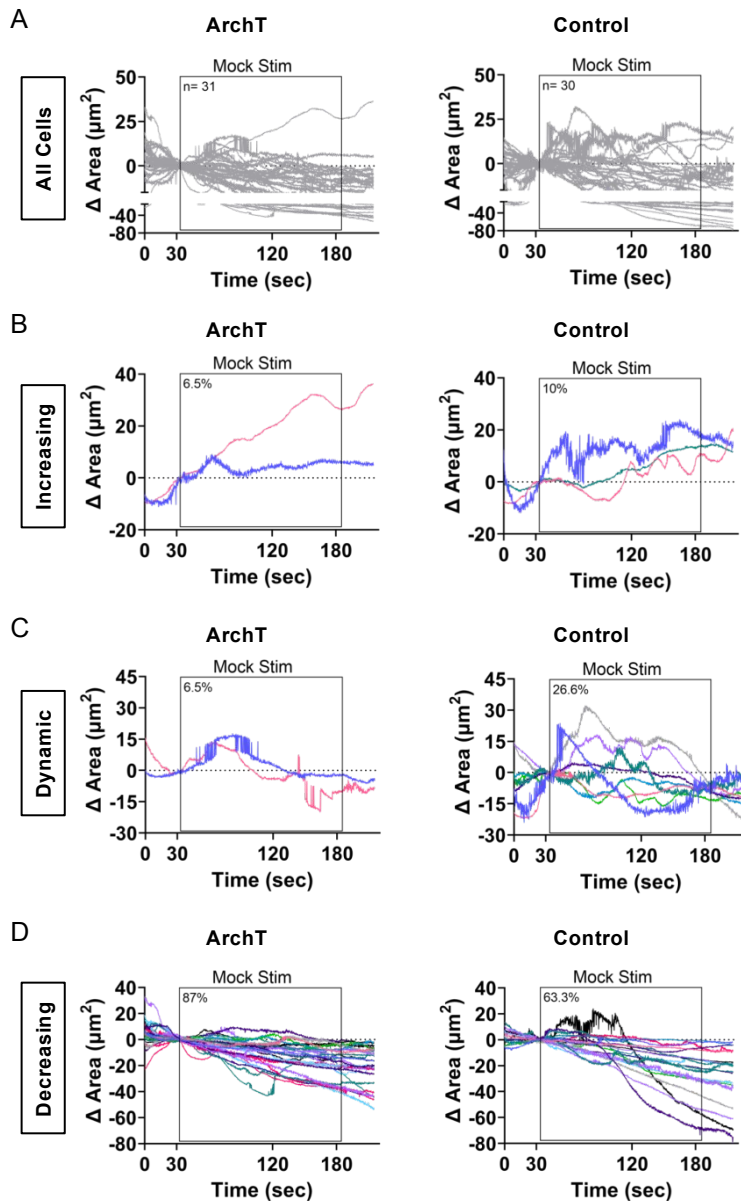

**Figure S8. Membrane dynamics with a mock stimulation.** (A) Membrane area changes were quantified within a mock-stimulation ROI for ArchT and control NIH3T3 cells. Individual traces are shown for each cell, black box indicates timing of mock stimulation ( $n=30-31$  cells per condition, from 3 biological replicates). (B-D) Binned traces of mock-stimulated ArchT and control 3T3 cells in (A) to characterize phenotypes that are protrusive (B), dynamic (C), and decreasing/static (D). Percentage of cells binned in each category is shown on each graph and summarized in Figure 5E.
